# Supplementary material for: An electrochemically polymerized and assembled cyclopalladated bi-thiophene imine for catalyzing coupling reactions: a modern strategy to enhance catalytic activity
Source: Royal Society of Chemistry journal article supplement (doi:10.1039/c4ra14974b), 2015-01-01
Supplement: c4ra14974b1.pdf [file c4ra14974b1.pdf]

## Supporting Information

### Electrochemical polymerized and assembled cyclopalladated bi-thiophene imine for catalyzing coupling reaction: A modern strategy to enhancing catalytic activity

Keke Zou<sup>a</sup>, Hui Liu<sup>a</sup>, Tiesheng Li<sup>a\*</sup>, Penglei Chen<sup>b</sup>, Minghua Liu<sup>b\*</sup>, Yangjie Wu<sup>a\*</sup>

<sup>a</sup>The College of Chemistry and Molecular Engineering, The key Lab of Biochemistry Organic Chemistry, The key Lab of Advanced Nano-information Materials of Zhengzhou, Zhengzhou University, Daxue road 100, Zhengzhou 450001, P. R. China.

<sup>b</sup>CAS Key Laboratory of Colloid, Interface and Chemical Thermodynamics, Institute of Chemistry, Chinese Academy of Sciences, No. 2 Zhongguancun Beiyijie, Beijing 100190, P. R. China.

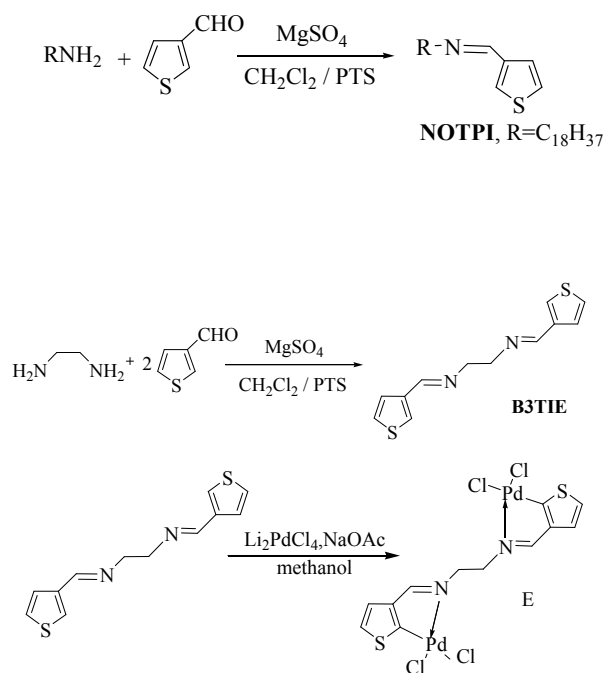

Scheme S1 Synthesis of NOTPI, B3TIE and CPDTDI (E)

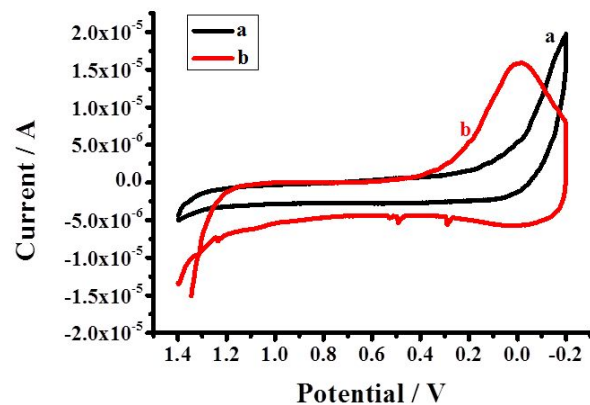

Figure S1 Cyclic voltammograms of (a) hydrophilic ITO and (b) **B3TIE** monolayer. (SP=12mN/m)

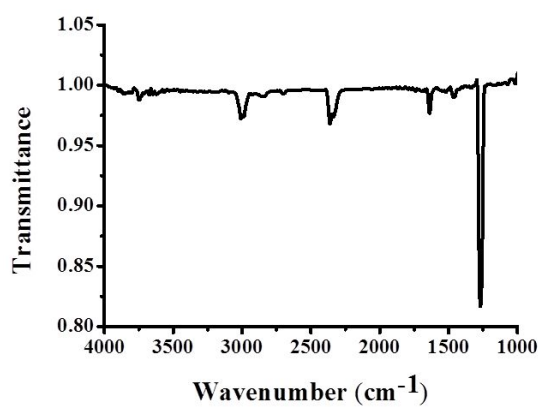

Figure S2 IR spectrum of two-layer LB films of **B3TIE** transferred onto CaF<sub>2</sub>. (SP = 12 mN/m)

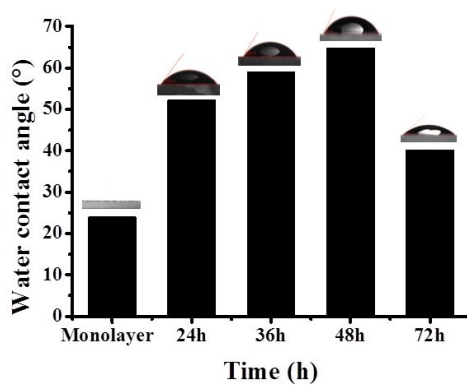

Figure S3 WCA histogram of different self-assembly time of **SABM**

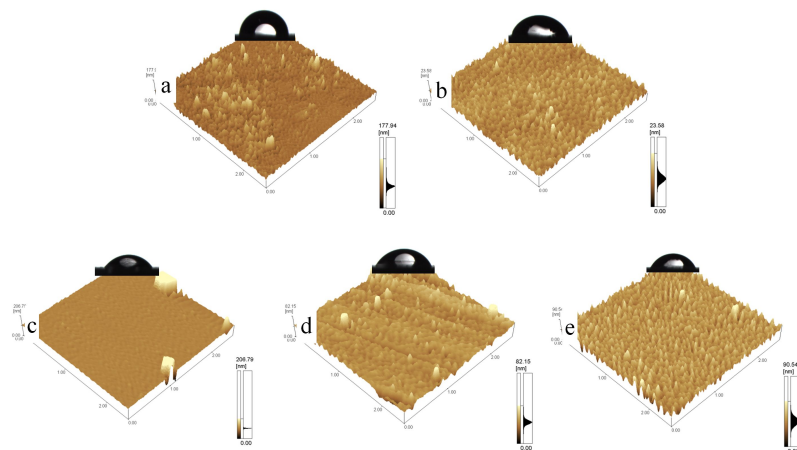

Figure S4 AFM images of **SABM** on silicon at (a) 8 mN/m, (b) 10 mN/m, (c) 12 mN/m, (d) 14 mN/m and (e) 16 mN/m.

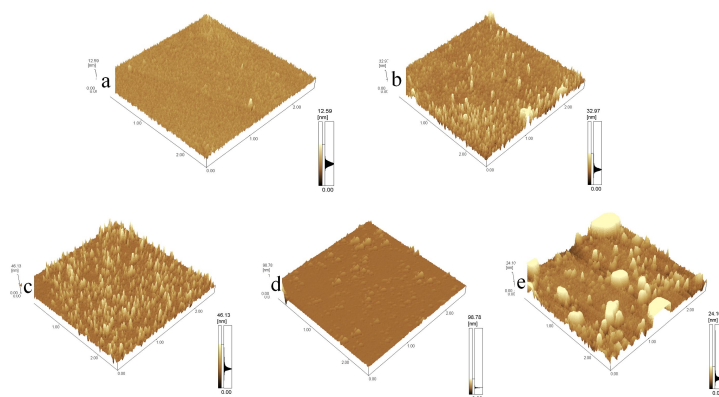

Figure S5 AFM images of **SABM** at different time (a, 0 h; a, 24h; c, 36h; d, 48h; e, 72h).

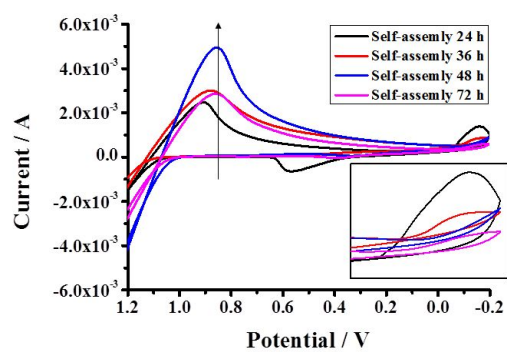

Figure S6 Cyclic voltammograms of different assembly time of **SABM** on ITO electrode.

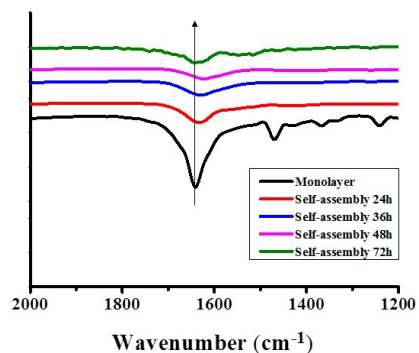

Figure S7 Infrared spectra of different assembly time of SABM on CaF<sub>2</sub> with Li<sub>2</sub>PdCl<sub>4</sub>

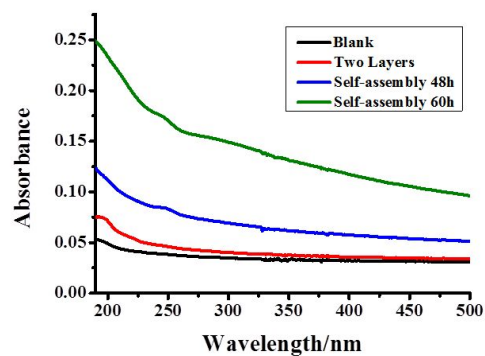

Figure S8 UV spectra of SABM for 48h and 60h.

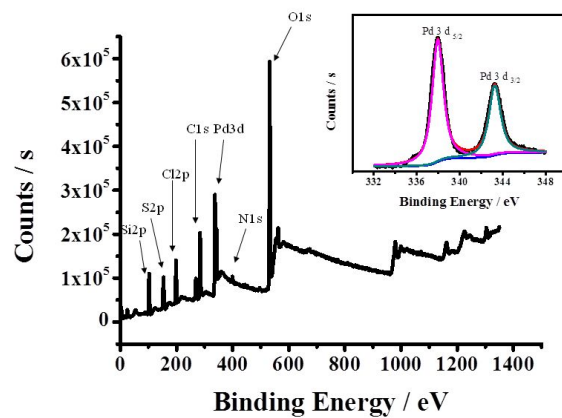

Figure S9 XPS spectra of SABM for 48h

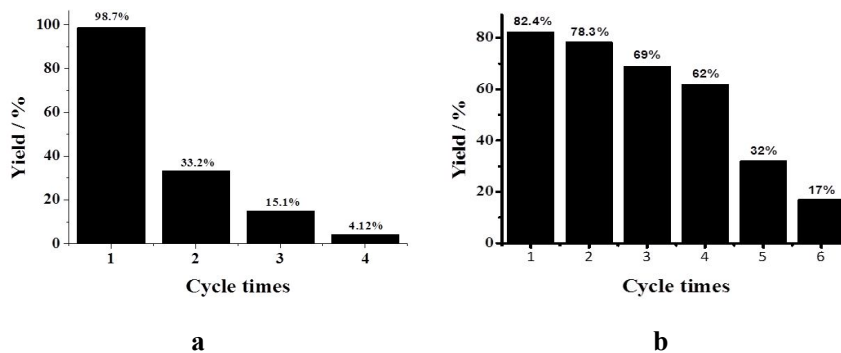

Figure S10 Yields obtained by SABM with (a) and without stirring (b)

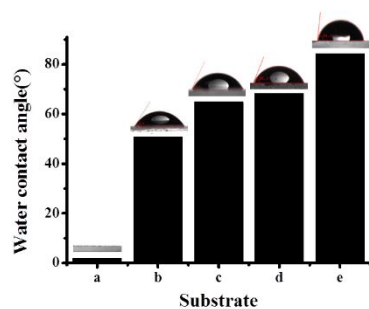

Figure S11 Water contact angles of a: hydrophilic silicon, b: **B3TIE** monolayer, c: **ECP B3TIE** monolayer, d: **SABM** and e: **ECP-SABM**.

Table S1 Effect of **SABM** deposited at different SP for Suzuki coupling reaction

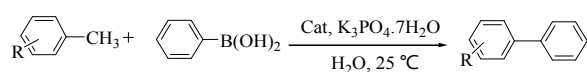

| Entry | Surface pressure (mN/m) | Isolated yield (%) |
|-------|-------------------------|--------------------|
| 1     | 8                       | 26.7               |
| 2     | 10                      | 23.8               |
| 3     | 12                      | 57.0               |
| 4     | 14                      | 11.7               |
| 5     | 16                      | 25.2               |

Reaction conditions: PhB(OH)<sub>2</sub> (0.30 mmol), 4-bromotoluene (0.25 mmol), Base (0.30 mmol), H<sub>2</sub>O (10 mL), TBAB (0.3 mmol). Isolated yield, based on the product. Reaction time 24 h.

Table S2 Selection of condition for Suzuki coupling reaction

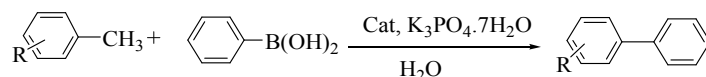

| Entry          | Reaction time (h) | Self-assembly time (h) | T (°C) | Isolated yield (%) | TON  |
|----------------|-------------------|------------------------|--------|--------------------|------|
| 1              | 24                | 24                     | 25     | 57                 | 4563 |
| 2              | 36                | 48                     | 40     | 50.4               | 4114 |
| 3              | 24                | 48                     | 40     | 73.6               | 6007 |
| 4              | 48                | 48                     | 50     | 42.2               | 3444 |
| 5              | 48                | 24                     | 40     | 68                 | 5550 |
| 6              | 48                | 48                     | 40     | 82.4               | 6726 |
| 7 <sup>a</sup> | 48                | 48                     | 40     | 76.4               | 5840 |

Reaction conditions: PhB(OH)<sub>2</sub> (0.30 mmol), 4-bromotoluene (0.25 mmol), Base (0.30 mmol), H<sub>2</sub>O (8 mL), TBAB (0.3 mmol). Deposition SP: 12mN/m; a: **SAMB** deposited at 16 mN/m.

Table S3 Substrate expansion for Suzuki coupling reaction

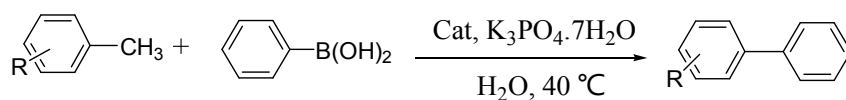

| Entry | ArX                                                            | Product | Isolated yield (%) |
|-------|----------------------------------------------------------------|---------|--------------------|
| 1     | <i>p</i> -CH <sub>3</sub> C <sub>6</sub> H <sub>4</sub> Br     |         | 82.4               |
| 2     | <i>p</i> -CH <sub>3</sub> OC <sub>6</sub> H <sub>4</sub> Br    |         | 85.6               |
| 3     | <i>p</i> -CF <sub>3</sub> C <sub>6</sub> H <sub>4</sub> Br     |         | 88                 |
| 4     | <i>p</i> -CHOC <sub>6</sub> H <sub>4</sub> Br                  |         | 62.4               |
| 5     | <i>p</i> -NO <sub>2</sub> C <sub>6</sub> H <sub>4</sub> Br     |         | 81.2               |
| 6     | <i>o</i> -CH <sub>3</sub> C <sub>6</sub> H <sub>4</sub> Br     |         | 82.8               |
| 7     | <i>o</i> -CHOC <sub>6</sub> H <sub>4</sub> Br                  |         | 87.8               |
| 8     | <i>m</i> -CHO-C <sub>6</sub> H <sub>4</sub> Br                 |         | 62.4               |
| 9     | <i>o</i> -COOCH <sub>3</sub> -C <sub>6</sub> H <sub>4</sub> Br |         | 99                 |
| 10    | <i>m</i> -CH <sub>3</sub> C <sub>6</sub> H <sub>4</sub> Br     |         | 86.4               |

|    |                                              |                                                                                   |      |
|----|----------------------------------------------|-----------------------------------------------------------------------------------|------|
| 11 | <i>p</i> -CNC <sub>6</sub> H <sub>4</sub> Br | 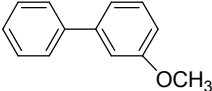 | 81.7 |
| 12 | <i>m</i> -CNC <sub>6</sub> H <sub>4</sub> Br |  | 62.8 |
| 13 | <i>o</i> -CNC <sub>6</sub> H <sub>4</sub> Br |  | 13.9 |

Reaction conditions: PhB(OH)<sub>2</sub> (0.30 mmol), ArBr (0.25 mmol), Base (0.30 mmol), H<sub>2</sub>O (8 mL), TBAB (0.3 mmol), 40°C for 48h.

The reaction of substrates with a strongly electron repulsive group, such as *p* or *m*-substituted of bromobenzene with styrene gave good yields (Table S3, entries 1-2, 10). Good yields were also obtained with strongly electron withdrawing group of *p* or *m*, *o*-substituted of bromobenzene (Table S3, entries 3, 5-7, 9-11). The yields were moderate with withdrawing or repulsive group in *p* or *m*-position (Table S3, entries 4, 8, 12). In the reaction system, the yield of 2-bromo-benzonitrile was only 13% because of steric effect (Table S3, entries 13).

Table S4 Content of palladium after recycling with **SABM**

| Entry                                          | 0    | 1    | 2    | 3    | 4    |
|------------------------------------------------|------|------|------|------|------|
| Substrate Pd count<br>( $\times 10^{-7}$ mmol) | 7.09 | 6.09 | 5.31 | 4.61 | 3.68 |
